# Supplementary material
Source: PubMed Central journal article supplement (PMC3754726)
Supplement: AEM.01049-13_zam999104580so1.pdf [file AEM.01049-13_zam999104580so1.pdf]

## **Supplementary Materials for**

# **Engineering the *meso*-Diaminopimelate Dehydrogenase from *Symbiobacterium thermophilum* by Site-Saturation Mutagenesis for D-Phenylalanine Synthesis**

Xiuzhen Gao<sup>1,3</sup>, Fang Huang<sup>2</sup>, Jinhui Feng<sup>1</sup>, Xi Chen<sup>1</sup>, Hailing Zhang<sup>1</sup>, Zhixiang Wang<sup>2</sup>, Qiaqing Wu<sup>1</sup> and Dunming Zhu<sup>1\*</sup>

<sup>1</sup>National Engineering Laboratory for Industrial Enzymes and Tianjin Engineering Center for Biocatalytic Technology, Tianjin Institute of Industrial Biotechnology, Chinese Academy of Sciences, 32 Xi Qi Dao, Tianjin Airport Economic Area, Tianjin 300308, China

<sup>2</sup>College of Chemistry and Chemical Engineering, University of Chinese Academy Sciences, 19A, Yuquan Road, Beijing 100049, China

<sup>3</sup>University of Chinese Academy Sciences, 19A, Yuquan Road, Beijing 100049, China

**TABLE S1** Primers for site-saturation and site-directed mutagenesis<sup>a</sup>

|       | Primers (5' to 3')                                                                        |
|-------|-------------------------------------------------------------------------------------------|
| F146X | CACCTACACCAAC <b>N</b> KGGTCCGGGTATGTCTATG<br>GACATACCCGGACCM <b>N</b> NGTTGGTGTAGGTGATAC |
| T171X | CTGTCTATG <b>N</b> KATCCCGGCGGGTATG<br>CCATACCCGCCGGGATM <b>N</b> NCATAGA                 |
| R181X | GTG TTCACAA <b>N</b> KGCGGTTTACGTTGAAC<br>TCCAGTTCAACGTAAACCGCM <b>N</b> NTTTGTG          |
| H227X | GCTGATGGACGTTGGT <b>N</b> KGGTGTGTTATG<br>GTTCCATAACAACACCM <b>N</b> NACCAACGTCCATC       |
| T171S | CTGTCTATG <b>T</b> CTATCCCGGCGGGTATG<br>CCATACCCGCCGGGAT <b>A</b> GACATAGA                |
| R181F | GTG TTCACAA <b>T</b> TTGCGGTTTACGTTGAAC<br>TCCAGTTCAACGTAAACCG <b>C</b> AAATTTGTG         |

<sup>a</sup>The bold letters were nucleotides changed.
